# Supplementary material
Source: PubMed Central journal article supplement (PMC1783978)
Supplement: NIHMS14981-supplement-Figure_1.pdf [file NIHMS14981-supplement-Figure_1.pdf]

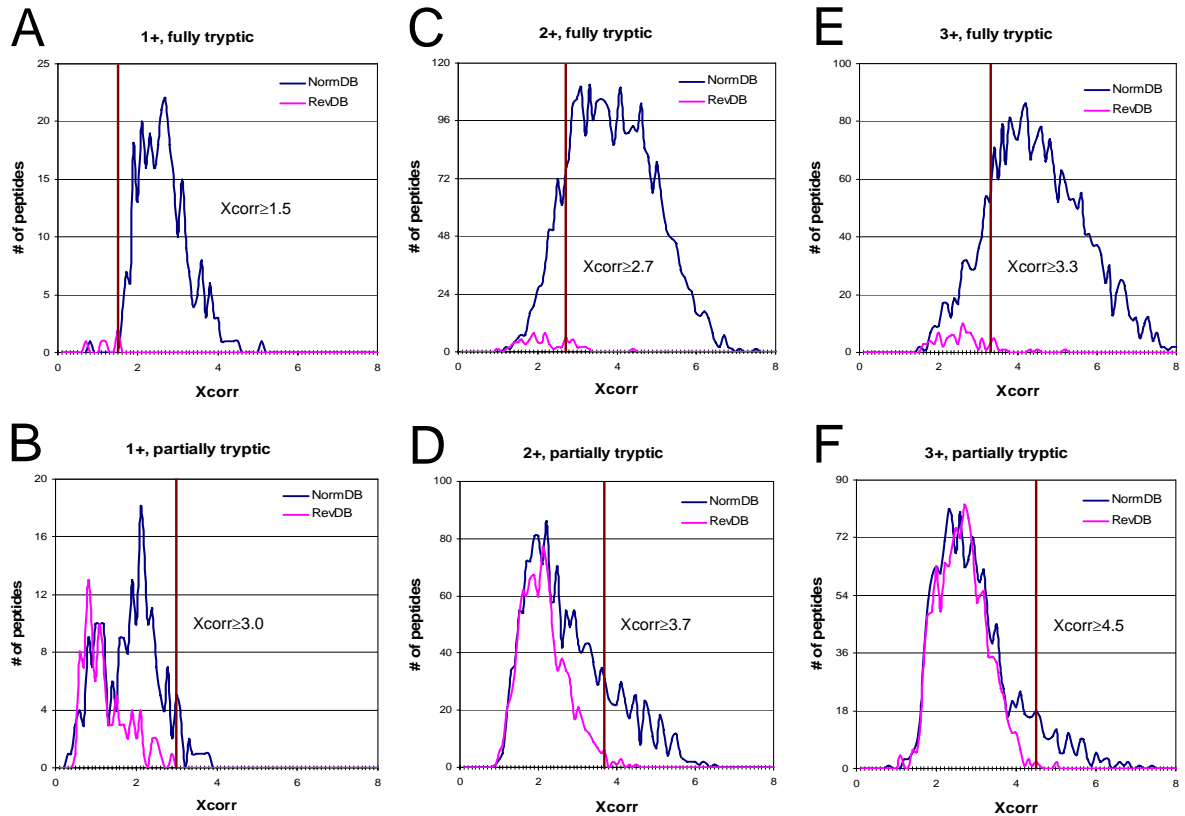

**Supplemental Figure 1.** Histograms showing distribution of Xcorr in peptides identified from normal database search (blue solid line, true plus false positives) and reversed database search (pink solid line, false positives). Distribution of fully tryptic peptides is shown in top panel for singly (A), doubly (C), and triply (E) charged peptides and distribution of partially tryptic peptides is shown in bottom panel for singly (B), doubly (D), and triply (F) charged peptides. Xcorr cutoff values for each peptide population used in this study are shown.
