# Supplementary material
Source: PubMed Central journal article supplement (PMC1783978)
Supplement: NIHMS14981-supplement-Figure_2.pdf [file NIHMS14981-supplement-Figure_2.pdf]

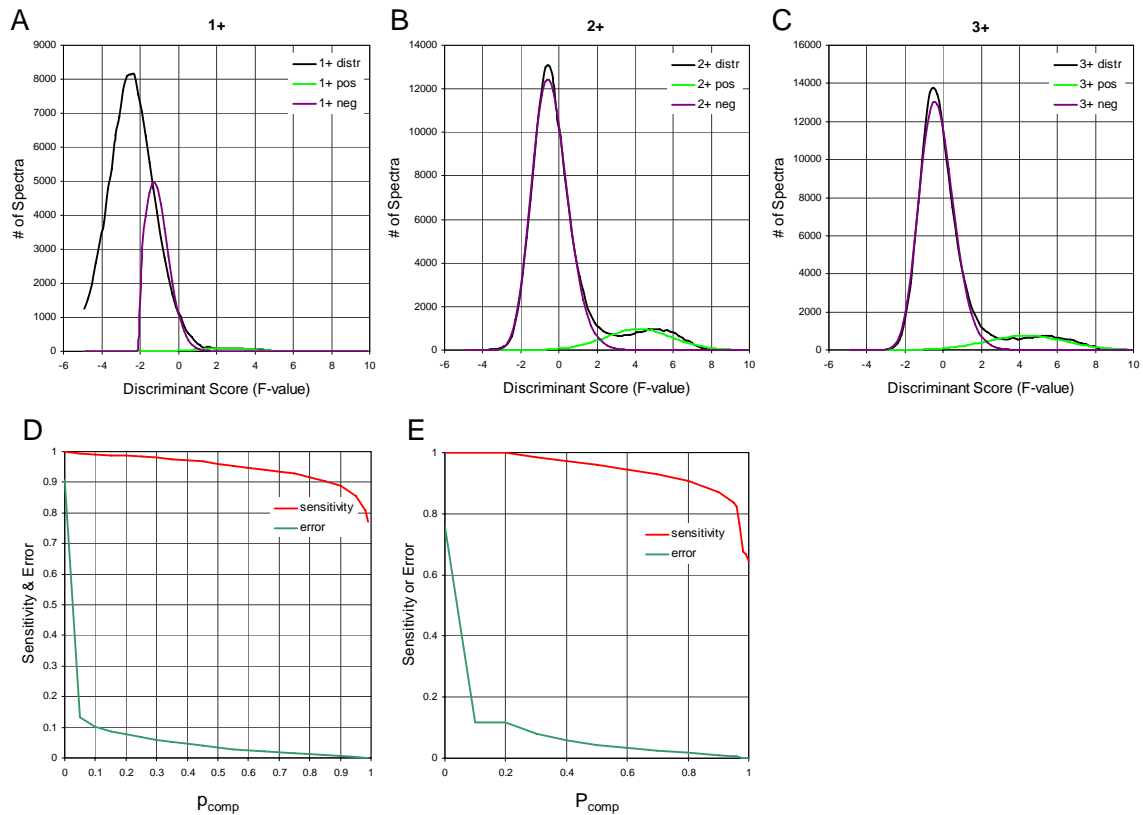

**Supplemental Figure 2.** Top panel shows statistical modeling of MS/MS data by Peptide Prophet. Singly (A), doubly (B), and triply (C) charged spectra were calculated individually. Bottom panel shows (D) Peptide Probability ( $p_{comp}$ ) and (E) Protein Probability ( $P_{comp}$ ) for acceptance of peptide and protein identifications, respectively.
