# Supplementary material
Source: PubMed Central journal article supplement (PMC1783978)
Supplement: NIHMS14981-supplement-Table_3.pdf [file NIHMS14981-supplement-Table_3.pdf]

**Supplemental Table 3.** A list of all 136 human cell differentiation (CD) molecules identified from trauma patient plasma.

| CD    | Accession #   | Peptide <sup>a</sup> | Protein name                                                | Gene ID | Gene    | TM <sup>b</sup> |
|-------|---------------|----------------------|-------------------------------------------------------------|---------|---------|-----------------|
| CD9   | IPI00215997.4 | 1                    | CD9 antigen.                                                | 928     | CD9     | 4               |
| CD10  | IPI00247063.2 | 1                    | Nepriylsin.                                                 | 4311    | MME     | 1               |
| CD13  | IPI00221224.4 | 44                   | Aminopeptidase N.                                           | 290     | ANPEP   | 1               |
| CD14  | IPI00029260.2 | 27                   | Monocyte differentiation antigen CD14.                      | 929     | CD14    | 0               |
| CD16a | IPI00218834.8 | 10                   | Low affinity immunoglobulin gamma Fc region receptor III-A. | 2214    | FCGR3A  | 1               |
| CD16b | IPI00023858.1 | 12                   | Low affinity immunoglobulin gamma Fc region receptor III-B. | 2215    | FCGR3B  | 1               |
| CD18  | IPI00291792.1 | 1                    | Integrin beta-2.                                            | 3689    | ITGB2   | 1               |
| CD21  | IPI00292859.1 | 10                   | Complement receptor type 2.                                 | 1380    | CR2     | 1               |
| CD26  | IPI00018953.1 | 23                   | Dipeptidyl peptidase IV.                                    | 1803    | DPP4    | 1               |
| CD27  | IPI00002435.1 | 1                    | Tumor necrosis factor receptor superfamily member 7.        | 939     | TNFRSF7 | 1               |
| CD29  | IPI00217563.3 | 10                   | Integrin beta-1.                                            | 3688    | ITGB1   | 1               |
| CD31  | IPI00295618.1 | 5                    | Platelet endothelial cell adhesion molecule.                | 5175    | PECAM1  | 1               |
| CD32  | IPI00023505.3 | 3                    | Low affinity immunoglobulin gamma Fc region receptor II-A.  | 2212    | FCGR2A  | 1               |
| CD32  | IPI00013969.1 | 1                    | Low affinity immunoglobulin gamma Fc region receptor II-B.  | 2213    | FCGR2B  | 1               |
| CD33  | IPI00022203.1 | 1                    | Myeloid cell surface antigen CD33.                          | 945     | CD33    | 1               |
| CD35  | IPI00412546.1 | 9                    | Complement receptor 1.                                      | 1378    | CR1     | 1               |
| CD36  | IPI00418495.4 | 1                    | Platelet glycoprotein IV.                                   | 948     | CD36    | 2               |
| CD37  | IPI00003400.1 | 1                    | Leukocyte antigen CD37.                                     | 951     | CD37    | 4               |
| CD41  | IPI00295976.4 | 9                    | Integrin alpha-IIB.                                         | 3674    | ITGA2B  | 1               |
| CD42a | IPI00027502.1 | 1                    | Platelet glycoprotein IX.                                   | 2815    | GP9     | 1               |
| CD42b | IPI00011255.3 | 13                   | Platelet glycoprotein IB alpha chain.                       | 2811    | GP1BA   | 1               |
| CD42d | IPI00027410.1 | 14                   | Platelet glycoprotein V.                                    | 2814    | GP5     | 1               |
| CD44  | IPI00305064.1 | 9                    | CD44 antigen.                                               | 960     | CD44    | 1               |
| CD45  | IPI00155168.1 | 6                    | Leukocyte common antigen.                                   | 5788    | PTPRC   | 2               |
| CD48  | IPI00013831.1 | 3                    | B-lymphocyte activation marker BLAST-1.                     | 962     | CD48    | 1               |
| CD49a | IPI00554627.1 | 1                    | Integrin alpha-1.                                           | 3672    | ITGA1   | 1               |
| CD49c | IPI00215995.1 | 1                    | Integrin alpha-3.                                           | 3675    | ITGA3   | 2               |
| CD49e | IPI00306604.5 | 5                    | Integrin alpha-5.                                           | 3678    | ITGA5   | 1               |
| CD49f | IPI00010697.1 | 3                    | Integrin alpha-6.                                           | 3655    | ITGA6   | 1               |
| CD50  | IPI00031620.1 | 12                   | Intercellular adhesion molecule-3.                          | 3385    | ICAM3   | 1               |

|        |               |    |                                                              |        |         |   |
|--------|---------------|----|--------------------------------------------------------------|--------|---------|---|
| CD54   | IPI00008494.3 | 27 | Intercellular adhesion molecule-1.                           | 3383   | ICAM1   | 1 |
| CD55   | IPI00292069.3 | 8  | Complement decay-accelerating factor.                        | 1604   | DAF     | 0 |
| CD56   | IPI00435020.3 | 17 | Neural cell adhesion molecule 1, 140 kDa isoform.            | 4684   | NCAM1   | 1 |
| CD58   | IPI00017529.1 | 1  | Lymphocyte function-associated antigen 3.                    | 965    | CD58    | 2 |
| CD59   | IPI00011302.1 | 7  | CD59 glycoprotein.                                           | 966    | CD59    | 0 |
| CD61   | IPI00220350.1 | 10 | Integrin beta-3.                                             | 3690   | ITGB3   | 1 |
| CD62E  | IPI00296542.1 | 7  | E-selectin.                                                  | 6401   | SELE    | 1 |
| CD62L  | IPI00218795.1 | 24 | L-selectin.                                                  | 6402   | SELL    | 1 |
| CD62P  | IPI00295339.3 | 13 | P-selectin.                                                  | 6403   | SELP    | 1 |
| CD66a  | IPI00009938.1 | 6  | Carcinoembryonic antigen-related cell adhesion molecule 1.   | 634    | CEACAM1 | 1 |
| CD71   | IPI00022462.1 | 2  | Transferrin receptor protein 1.                              | 7037   | TFRC    | 1 |
| CD84   | IPI00022039.1 | 2  | Leukocyte antigen CD84.                                      | 8832   | CD84    | 1 |
| CD85c  | IPI00009961.1 | 7  | Leukocyte immunoglobulin-like receptor subfamily B member 5. | 10990  | LILRB5  | 1 |
| CD85d  | IPI00303952.3 | 2  | Leukocyte immunoglobulin-like receptor subfamily B member 2. | 10288  | LILRB2  | 1 |
| CD85e  | IPI00329104.4 | 13 | Leukocyte immunoglobulin-like receptor subfamily A member 3. | 11026  | LILRA3  | 0 |
| CD85h  | IPI00027972.1 | 4  | Leukocyte immunoglobulin-like receptor subfamily A member 2. | 11027  | LILRA2  | 0 |
| CD85j  | IPI00385705.1 | 3  | Leukocyte immunoglobulin-like receptor subfamily B member 1. | 10859  | LILRB1  | 1 |
| CD90   | IPI00022892.2 | 1  | Thy-1 membrane glycoprotein.                                 | 7070   | THY1    | 0 |
| CD91   | IPI00020557.1 | 70 | Low-density lipoprotein receptor-related protein 1.          | 4035   | LRP1    | 1 |
| CDw92  | IPI00005068.2 | 1  | Choline transporter-like protein.                            | 23446  | CDW92   | 9 |
| CD93   | IPI00299485.3 | 11 | Complement component C1q receptor.                           | 22918  | C1QR1   | 1 |
| CD95   | IPI00235003.9 | 2  | Tumor necrosis factor receptor superfamily member 6.         | 355    | FAS     | 0 |
| CD98   | IPI00027493.1 | 14 | 4F2 cell-surface antigen heavy chain.                        | 6520   | SLC3A2  | 1 |
| CD99   | IPI00253036.5 | 4  | T-cell surface glycoprotein E2.                              | 4267   | CD99    | 2 |
| CD100  | IPI00023807.1 | 2  | Semaphorin 4D.                                               | 10507  | SEMA4D  | 2 |
| CD102  | IPI00009477.3 | 14 | Intercellular adhesion molecule-2.                           | 3384   | ICAM2   | 1 |
| CD103  | IPI00007205.1 | 1  | Integrin alpha-E.                                            | 3682   | ITGAE   | 1 |
| CD105  | IPI00017567.3 | 6  | Endoglin.                                                    | 2022   | ENG     | 1 |
| CD106  | IPI00018136.1 | 49 | Vascular cell adhesion protein 1.                            | 7412   | VCAM1   | 1 |
| CD107a | IPI00004503.3 | 16 | Lysosome-associated membrane glycoprotein 1.                 | 3916   | LAMP1   | 1 |
| CD107b | IPI00009030.1 | 14 | Lysosome-associated membrane glycoprotein 2.                 | 3920   | LAMP2   | 1 |
| CD108  | IPI00025257.1 | 8  | Semaphorin 7A.                                               | 8482   | SEMA7A  | 0 |
| CD109  | IPI00152540.2 | 17 | CD109.                                                       | 135228 | CD109   | 0 |

|         |               |    |                                                                        |        |          |   |
|---------|---------------|----|------------------------------------------------------------------------|--------|----------|---|
| CD111   | IPI0003648.2  | 7  | Poliovirus receptor related protein 1.                                 | 5818   | PVRL1    | 2 |
| CD112   | IPI00215980.1 | 3  | Poliovirus receptor related protein 2.                                 | 5819   | PVRL2    | 1 |
| CDw113  | IPI00022959.1 | 5  | Nectin 3.                                                              | 25945  | PVRL3    | 1 |
| CD115   | IPI00011218.1 | 17 | Macrophage colony stimulating factor I receptor.                       | 1436   | CSF1R    | 1 |
| CD116   | IPI00012009.1 | 1  | Granulocyte-macrophage colony-stimulating factor receptor alpha chain. | 1438   | CSF2RA   | 1 |
| CD117   | IPI00022296.1 | 14 | Mast/stem cell growth factor receptor.                                 | 3815   | KIT      | 2 |
| CD120a  | IPI00018880.2 | 2  | Tumor necrosis factor receptor superfamily member 1A.                  | 7132   | TNFRSF1A | 2 |
| CD120b  | IPI00023501.2 | 2  | Tumor necrosis factor receptor superfamily member 1B.                  | 7133   | TNFRSF1B | 1 |
| CD121a  | IPI00027508.1 | 1  | Interleukin-1 receptor, type I.                                        | 3554   | IL1R1    | 1 |
| CD121b  | IPI00021382.1 | 9  | Interleukin-1 receptor, type II.                                       | 7850   | IL1R2    | 1 |
| CDw125  | IPI00306687.3 | 1  | Interleukin-5 receptor alpha chain.                                    | 3568   | IL5RA    | 1 |
| CD126   | IPI00031171.1 | 3  | Interleukin-6 receptor alpha chain.                                    | 3570   | IL6R     | 1 |
| CD130   | IPI00297124.1 | 17 | Interleukin-6 receptor beta chain.                                     | 3572   | IL6ST    | 1 |
| CD135   | IPI00005722.5 | 1  | fms-related tyrosine kinase 3.                                         | 2322   | FLT3     | 2 |
| CD138   | IPI00002441.1 | 1  | Syndecan-1.                                                            | 6382   | SDC1     | 1 |
| CD140b  | IPI00015902.3 | 3  | Beta platelet-derived growth factor receptor.                          | 5159   | PDGFRB   | 1 |
| CD141   | IPI00010737.1 | 2  | Thrombomodulin.                                                        | 7056   | THBD     | 1 |
| CD143   | IPI00437751.1 | 16 | Angiotensin-converting enzyme, somatic isoform.                        | 1636   | ACE      | 1 |
| CD144   | IPI00012792.1 | 24 | Vascular endothelial-cadherin.                                         | 1003   | CDH5     | 2 |
| CD146   | IPI00016334.1 | 16 | Cell surface glycoprotein MUC18.                                       | 4162   | MCAM     | 1 |
| CD147   | IPI00218019.1 | 1  | Basigin.                                                               | 682    | BSG      | 2 |
| CD148   | IPI00290328.2 | 22 | Receptor-type tyrosine-protein phosphatase eta.                        | 5795   | PTPRJ    | 1 |
| CD151   | IPI00298851.3 | 1  | Platelet-endothelial tetraspan antigen 3.                              | 977    | CD151    | 4 |
| CD155   | IPI00299158.1 | 12 | Poliovirus receptor.                                                   | 5817   | PVR      | 1 |
| CD156b  | IPI00288894.1 | 1  | ADAM 17.                                                               | 6868   | ADAM17   | 1 |
| CDw156C | IPI00013897.1 | 1  | ADAM 10.                                                               | 102    | ADAM10   | 1 |
| CD157   | IPI00026240.1 | 16 | ADP-ribosyl cyclase 2.                                                 | 683    | BST1     | 1 |
| CD162   | IPI00029591.1 | 1  | P-selectin glycoprotein ligand 1.                                      | 6404   | SELPLG   | 1 |
| CD163   | IPI00513892.1 | 59 | CD163 antigen isoform B.                                               | 9332   | CD163    | 2 |
| CD166   | IPI00015102.1 | 22 | CD166 antigen.                                                         | 214    | ALCAM    | 1 |
| CD171   | IPI00027087.1 | 4  | Neural cell adhesion molecule L1.                                      | 3897   | L1CAM    | 1 |
| CD172a  | IPI00332887.3 | 9  | Protein tyrosine phosphatase, non-receptor type substrate 1.           | 140885 | PTPNS1   | 1 |
| CD172b  | IPI00299724.1 | 3  | Signal-regulatory protein beta-1.                                      | 10326  | SIRPB1   | 1 |

|         |               |    |                                                                |       |           |    |
|---------|---------------|----|----------------------------------------------------------------|-------|-----------|----|
| CD179b  | IPI00013438.1 | 3  | Immunoglobulin lambda-like polypeptide 1.                      | 3543  | IGLL1     | 0  |
| CD180   | IPI00023722.1 | 1  | CD180 antigen.                                                 | 4064  | LY64      | 1  |
| CD182   | IPI00012320.1 | 1  | High affinity interleukin-8 receptor B.                        | 3579  | IL8RB     | 6  |
| CD195   | IPI00023213.3 | 1  | CC chemokine receptor 5.                                       | 1234  | CCR5      | 6  |
| CD201   | IPI00009276.1 | 5  | Endothelial protein C receptor.                                | 10544 | PROCR     | 1  |
| CD202b  | IPI00412829.1 | 1  | Angiopoietin 1 receptor.                                       | 7010  | TEK       | 1  |
| CD205   | IPI00027381.2 | 1  | Lymphocyte antigen 75.                                         | 4065  | LY75      | 1  |
| CD206   | IPI00027848.1 | 45 | Macrophage mannose receptor.                                   | 4360  | MRC1      | 1  |
| CD208   | IPI00004307.1 | 1  | Lysosomal-associated membrane protein 3.                       | 27074 | LAMP3     | 1  |
| CDw210a | IPI00014417.1 | 1  | Interleukin-10 receptor alpha chain.                           | 3587  | IL10RA    | 1  |
| CDw210b | IPI00171871.4 | 1  | Interleukin-10 receptor beta chain.                            | 3588  | IL10RB    | 1  |
| CD213a1 | IPI00020354.1 | 4  | Interleukin-13 receptor alpha-1 chain.                         | 3597  | IL13RA1   | 2  |
| CDw217  | IPI00304993.3 | 1  | Interleukin-17 receptor.                                       | 23765 | IL17R     | 2  |
| CD222   | IPI00289819.4 | 43 | Cation-independent mannose-6-phosphate receptor.               | 3482  | IGF2R     | 1  |
| CD224   | IPI00018901.1 | 2  | Gamma-glutamyltranspeptidase 1.                                | 2678  | GGT1      | 3  |
| CD228   | IPI00029275.1 | 1  | Melanotransferrin.                                             | 4241  | MFI2      | 0  |
| CD230   | IPI00022284.3 | 1  | Major prion protein.                                           | 5621  | PRNP      | 2  |
| CD233   | IPI00022361.1 | 3  | Band 3 anion transport protein.                                | 6521  | SLC4A1    | 11 |
| CD239   | IPI00002406.1 | 4  | Lutheran blood group glycoprotein.                             | 4059  | LU        | 1  |
| CD248   | IPI00006971.1 | 4  | Tumor endothelial marker 1.                                    | 57124 | CD248     | 1  |
| CD249   | IPI00014375.1 | 4  | Glutamyl aminopeptidase.                                       | 2028  | ENPEP     | 1  |
| CD263   | IPI00021970.7 | 1  | Tumor necrosis factor receptor superfamily member 10C.         | 8794  | TNFRSF10C | 2  |
| CD276   | IPI00019275.2 | 4  | B7 homolog.                                                    | 80381 | CD276     | 1  |
| CD280   | IPI00005707.5 | 12 | Urokinase receptor-associated protein uPARAP.                  | 9902  | MRC2      | 1  |
| CD284   | IPI00008673.1 | 1  | Toll-like receptor 4.                                          | 7099  | TLR4      | 1  |
| CD297   | IPI00004065.2 | 3  | Ecto-ADP-ribosyltransferase 4.                                 | 420   | DO        | 0  |
| CD300a  | IPI00414784.1 | 1  | CMRF35-H antigen.                                              | 11314 | CD300A    | 1  |
| CD304   | IPI00299594.1 | 32 | Neuropilin-1.                                                  | 8829  | NRP1      | 1  |
| CD305   | IPI00028015.1 | 1  | Leukocyte-associated Ig-like receptor 1 isoform B.             | 3903  | LAIR1     | 1  |
| CD309   | IPI00021396.1 | 1  | Vascular endothelial growth factor receptor 2.                 | 3791  | KDR       | 2  |
| CD312   | IPI00296277.5 | 1  | EGF-like module containing mucin-like hormone receptor-like 2. | 30817 | EMR2      | 7  |
| CD317   | IPI00026241.1 | 2  | Bone marrow stromal antigen 2.                                 | 684   | BST2      | 1  |
| CD321   | IPI00001754.1 | 1  | Junctional adhesion molecule 1.                                | 50848 | F11R      | 2  |

|        |               |   |                                                 |       |         |   |
|--------|---------------|---|-------------------------------------------------|-------|---------|---|
| CD322  | IPI00299083.5 | 1 | Junctional adhesion molecule 2.                 | 58494 | JAM2    | 1 |
| CD324  | IPI00025861.2 | 7 | E-cadherin.                                     | 999   | CDH1    | 1 |
| CDw325 | IPI00290085.1 | 9 | Neural-cadherin.                                | 1000  | CDH2    | 1 |
| CDw327 | IPI00171897.4 | 1 | Sialic acid binding Ig-like lectin 6 isoform A. | 946   | SIGLEC6 | 1 |
| CD331  | IPI00005142.1 | 6 | Basic fibroblast growth factor receptor 1.      | 2260  | FGFR1   | 1 |
| CD332  | IPI00010777.1 | 1 | Fibroblast growth factor receptor 2.            | 2263  | FGFR2   | 1 |
| CD334  | IPI00304578.1 | 2 | Fibroblast growth factor receptor 4.            | 2264  | FGFR4   | 0 |
| CD339  | IPI00099650.2 | 1 | Jagged 1.                                       | 182   | JAG1    | 1 |

<sup>a</sup> Number of unique peptides identified for each protein.

<sup>b</sup> Number of transmembrane domains predicted by TMHMM model.
